Title : ENFLURANE CONCENTRATION: INFLUENCE OF SEMICLOSED SYSTEM  
Authors : E. Goldman, M.D., T. de Campo, M.D., and J. A. Aldrete, M.D.  
Affiliation: Department of Anesthesiology, University of Colorado Medical Center,  
Denver, Colorado 80262

**Introduction.** While the anesthetic concentration delivered by the vaporizer and the actual inspired concentration are equal in an open anesthetic system, in a semiclosed system partial rebreathing with dilution of anesthetic gases can modify this relationship. Since the rate of rise of alveolar concentration ( $F_A$ ) over inspired concentration ( $F_I$ ) and the enflurane uptake ( $\dot{U}_E$ ) have been obtained using non-rebreathing high flow systems (1,2), we devised a protocol to determine, in a semiclosed system:

1. The correlation between the concentration of enflurane delivered by the vaporizer ( $F_{VAP}$ ) and the actual inspired anesthetic concentration ( $F_I$ ) using different flows.

2. The rate of rise of  $F_A/F_I$  and the decay in uptake as a function of time.

**Methods.** Fourteen patients ASA I-II scheduled for elective surgical procedures were included in this study. The concentration of anesthetic gas and the end-tidal  $CO_2$  ( $F_{ET}CO_2$ ) were measured with a double input mass spectrometer. One of the inputs was connected to the inspiratory limb of the circuit to determine  $F_I$ , and the other to a catheter located in the trachea to obtain end-tidal enflurane, considered equivalent to alveolar enflurane ( $F_A$ ), and  $F_{ET}CO_2$ . The vaporizer used was a calibrated Vernitrol type.  $F_{VAP}$  was calculated from standard equations based on vapor pressure, barometric pressure, flow through vaporizer and total flow ( $F_{TOT}$ ).

$\dot{U}_E$  was calculated according to the following equation:

$$\dot{U}_E = (F_A/F_I - 1) \times F_I \times \dot{V}_A$$

Alveolar ventilation ( $\dot{V}_A$ ) was calculated from  $F_{ET}CO_2$ . Data was evaluated using regression analysis, unpaired t-test and Mann-Whitney test.

**Results.** The difference between  $F_{VAP}$  and the actual  $F_I$  was flow dependent, fitting the following function

$$y = 7.3e^{-1.6x}$$

( $r = -.70$ ,  $p < .001$ ). With  $F_{TOT}$  as low as 1 L/min,  $F_{VAP} - F_I$  was  $0.79 \pm .53$ ; however, with  $F_{TOT}$  lower than 1 L/min the difference was  $3.4 \pm 2.9$  ( $p < .001$ ).

$F_A/F_I$  and uptake were comparable with Torri's data.

$F_{ET}CO_2$  showed a negative correlation with  $F_A/F_I$  ( $r = -.62$ ;  $p < 0.01$ ).

| Time (min) | $F_A/F_I$     | p    | $F_A/F_I^*$   | $\dot{U}_E$ (ml/min) | $\dot{U}_E^*$ (ml/min) |
|------------|---------------|------|---------------|----------------------|------------------------|
| 15         | $.74 \pm .11$ | NS   | $.61 \pm .02$ | $30 \pm 24$          | 30                     |
| 30         | $.76 \pm .05$ | NS   | $.67 \pm .01$ | $27 \pm 21$          | 22                     |
| 45         | $.78 \pm .06$ | NS   | $.70 \pm .02$ | $22 \pm 16$          | 18                     |
| 60         | $.85 \pm .02$ | <.05 | $.72 \pm .02$ | $15 \pm 7$           | 17                     |

\* Data from Torri et al (1,2).

Values expressed as mean  $\pm$  standard error.

**Conclusions.** In a semiclosed system with flows as low as one liter,  $F_{VAP}$  represents an adequate indication of the inhaled anesthetic concentration. However, if lower flows are administered the actual  $F_I$  cannot be estimated from  $F_{VAP}$ .

The  $\dot{U}_E$  as well as the rate of rise of  $F_A$  in a semiclosed system, even with small flows, is comparable with available data obtained using higher flow and non-rebreathing techniques.

#### References

1. Torri G, Damia G, Fabiani ML et al: Uptake and elimination of enflurane in man. Brit J Anaesth 44:789-794, 1972.
2. Torri G: Uptake and elimination of enflurane at constant inspired and alveolar concentration. Acta Anaes Belg 25:190-197, 1974.
